# Supplementary material for: The evolution of genetic variability at the LRRK2 locus
Source: Research Square preprint supplement (doi:10.21203/rs.3.rs-4001026/v1), 2024-03-13
Supplement: Supplementary file 1 [file ea77d29a0f46e52c9387413d.docx]

**Supplemental Methods**

*Clinical Evaluation*

Clinical exams were performed by movement disorders specialty-trained neurologists and diagnoses made using UK Brain Bank Criteria for PD1.

*Data Genotyping and Preprocessing*

Individuals were genotyped using the Affymetrix 5.0 (500K) or Multi-Ethnic Genotyping Array (MEGA) (Illumina) and the two datasets combined in PLINK. LRRK2 p.G2019S (rs34637584_A) was genotyped using Taqman probe C__63498123_10 (ThermoFisher Scientific). Imputation was performed in Beagle 3.3 using European and Tunisian genome data as a reference. SNPs were filtered by genotyping rate (<95%), Hardy-Weinberg equilibrium (p<0.01), R2 (<95%) and imputation accuracy (<98%).2 Imputed data was imported into PLINK3. Appropriate phasing was confirmed for the most distal 5’ and 3’ SNP alleles *in cis* by inspecting the same marker data within LRRK2 p.G2019S pedigrees4.

*Phylogenetic Analysis*

Patients with idiopathic PD and individuals with rs34637584_A, regardless of disease status, were included in phylogenetic analysis. Distinct haplotypes spanning the LRRK2 p.G2019S mutation were identified in R using the ‘phangorn’ package5,6 and used the Tamura and Nei ’93 model7. Estimation of the maximum likelihood of distinct haplotypes was performed with 1000 permutations. Linear mixed effects regression analyses assessed *LRRK2 cis* and *trans* haplotype effects on age at onset (AOO), using the ‘coxme’ R package, adjusting for sex and kinship coefficients, as previous8. Variable length Markov chain Monte Carlo method within Beagle3.3 was used to extract haplotypes potentially associated with AOO, dichotomizing groups by the median and by comparing quartile extremes9.

*Estimation of Generational Age*

The age of LRRK2 p.G2019S was estimated using marker allele frequencies and the recombination fraction between haplotypes. The age of the mutation in generations (g) was derived from g=ln(δ)/ln(1-θ) for each marker10. Here, δ represents the linkage equilibrium index (Pm – Pn) / (1 - Pn) where Pm and Pn represents the allele frequency in carriers and noncarriers, respectively. θ represents the recombination fraction as a function of distance between the candidate location and the LRRK2 gene11.

*Evaluation of Positive Selection*

To examine the intervals of adaptation, we characterized integrated haplotype scores (iHS) for two groups: 1) with rs34637584_A (LRRK2 c.6055G>A (p.G2019S) including heterozygotes and homozygotes (AG and AA)), and 2) with rs34637584_G only (idiopathic PD and control subjects without the LRRK2 p.G2019S mutation (GG)). SHAPEIT212 and selscan v1.1.0 software calculated unstandardized iHS. The absolute value iHS scores were plotted against their genomic position.

To test the positive selection in *trans*, we first removed known inflammatory associated mutations within our LRRK2 locus (Crohn’s Disease: rs11175593 and rs4768236; and Pediatric Autoimmunity: rs17466626). One or more of these SNPs was identified in 214 alleles, leaving 208 alleles. P-values were simulated by bootstrap sampling 100,000 iHS values across chromosome 12 for comparison.

**Supplementary Table 1: Analysis of mutational age**

| SNP | Mutation | Mb (GRCh38) | Pn  (freq in non-carriers) | Pm  (freq in carriers) | Theta | Delta | Estimated Age of Mutation (generations) |
| --- | --- | --- | --- | --- | --- | --- | --- |
| rs878010 | A/T | 40.108843 | 0.352 | 0.657 | 0.135581 | 0.470679 | 5.17 |
| rs900253 | C/T | 40.108943 | 0.361 | 0.664 | 0.135477 | 0.474178 | 5.13 |
| rs1482287 | A/T | 40.113336 | 0.375 | 0.667 | 0.134137 | 0.4672 | 5.28 |
| rs7310430 | A/T | 40.114388 | 0.366 | 0.664 | 0.134012 | 0.470032 | 5.25 |
| rs4533099 | A/C | 40.127691 | 0.134 | 0.08 | 0.12672 | 0.062356 | 20.48 |
| rs11564137 | C/T | 40.127785 | 0.176 | 0.07 | 0.126687 | 0.128641 | 15.14 |
| rs11175260 | C/T | 40.128094 | 0.063 | 0.04 | 0.126587 | 0.024546 | 27.39 |
| rs10784386 | A/G | 40.135842 | 0.382 | 0.67 | 0.123839 | 0.466019 | 5.78 |
| rs2404574 | C/T | 40.138199 | 0.186 | 0.073 | 0.122652 | 0.138821 | 15.09 |
| rs767940 | C/G | 40.138693 | 0.241 | 0.153 | 0.122392 | 0.115942 | 16.50 |
| rs10878123 | A/T | 40.138731 | 0.063 | 0.039 | 0.12237 | 0.025614 | 28.07 |
| rs726330 | A/C | 40.142259 | 0.265 | 0.105 | 0.120226 | 0.217687 | 11.90 |
| rs2638271 | C/G | 40.147232 | 0.316 | 0.151 | 0.117376 | 0.241228 | 11.39 |
| rs2638270 | G/T | 40.147356 | 0.26 | 0.122 | 0.117308 | 0.186486 | 13.46 |
| rs11564122 | A/G | 40.153948 | 0.061 | 0.018 | 0.112092 | 0.045793 | 25.94 |
| rs11564215 | A/C | 40.156271 | 0.109 | 0.072 | 0.111038 | 0.041526 | 27.03 |
| rs11564157 | C/T | 40.160295 | 0.136 | 0.089 | 0.108082 | 0.054398 | 25.45 |
| rs1388587 | C/G | 40.167733 | 0.359 | 0.226 | 0.103539 | 0.207488 | 14.39 |
| rs11175456 | A/G | 40.173779 | 0.142 | 0.091 | 0.100482 | 0.059441 | 26.66 |
| rs10878199 | G/T | 40.173801 | 0.232 | 0.14 | 0.100458 | 0.119792 | 20.04 |
| rs2638245 | C/T | 40.178345 | 0.405 | 0.683 | 0.096405 | 0.467227 | 7.51 |
| rs2708404 | A/G | 40.181828 | 0.25 | 0.099 | 0.094713 | 0.201333 | 16.11 |
| rs2046932 | A/G | 40.186638 | 0.087 | 0.032 | 0.093596 | 0.060241 | 28.59 |
| rs1491924 | C/T | 40.194128 | 0.066 | 0.042 | 0.091636 | 0.025696 | 38.10 |
| rs11564274 | C/T | 40.196818 | 0.072 | 0.027 | 0.08961 | 0.048491 | 32.24 |
| rs2723266 | C/T | 40.201740 | 0.022 | 0.002 | 0.08253 | 0.02045 | 45.16 |
| rs1491940 | A/T | 40.204542 | 0.476 | 0.253 | 0.082318 | 0.425573 | 9.95 |
| rs2723261 | C/T | 40.208006 | 0.478 | 0.253 | 0.08197 | 0.431034 | 9.84 |
| rs11175593 | C/T | 40.208138 | 0.05 | 0.033 | 0.08196 | 0.017895 | 47.05 |
| rs2708437 | C/T | 40.220977 | 0.091 | 0.058 | 0.076446 | 0.036304 | 41.70 |
| rs2708438 | A/G | 40.221630 | 0.091 | 0.058 | 0.076182 | 0.036304 | 41.85 |
| rs1491943 | A/T | 40.226614 | 0.044 | 0.029 | 0.073563 | 0.01569 | 54.37 |
| rs1352878 | C/T | 40.232483 | 0.027 | 0.012 | 0.071417 | 0.015416 | 56.31 |
| rs2723267 | A/C | 40.232887 | 0.017 | 0.005 | 0.071294 | 0.012208 | 59.57 |
| rs2249281 | C/T | 40.237556 | 0.037 | 0.012 | 0.068101 | 0.025961 | 51.77 |
| rs10878244 | A/G | 40.237806 | 0.099 | 0.016 | 0.067702 | 0.09212 | 34.02 |
| rs10878245 | C/T | 40.237989 | 0.422 | 0.701 | 0.067137 | 0.482699 | 10.48 |
| rs7134379 | C/T | 40.251072 | 0.347 | 0.167 | 0.06087 | 0.275651 | 20.52 |
| rs4293189 | A/G | 40.263423 | 0.324 | 0.667 | 0.045654 | 0.507396 | 14.52 |
| rs4768224 | A/T | 40.267601 | 0.348 | 0.153 | 0.043791 | 0.29908 | 26.96 |
| rs10878356 | A/G | 40.316155 | 0.232 | 0.101 | 0.025452 | 0.170573 | 68.60 |
| rs11564177 | C/T | 40.320530 | 0.114 | 0.026 | 0.023904 | 0.099323 | 95.45 |
| rs10878368 | A/T | 40.320983 | 0.49 | 0.746 | 0.023893 | 0.501961 | 28.50 |
| rs10506153 | C/T | 40.331769 | 0.119 | 0.028 | 0.012793 | 0.103292 | 176.32 |
| rs34637584 | G/A | 40.734202 | - | - | - | - | - |
| rs11564259 | C/G | 40.398395 | 0.052 | 0.035 | 0.024735 | 0.017932 | 160.55 |
| rs11564172 | A/C | 40.398422 | 0.103 | 0.043 | 0.024736 | 0.06689 | 107.99 |
| rs11564258 | A/G | 40.398498 | 0.052 | 0.035 | 0.024738 | 0.017932 | 160.53 |
| rs971616 | G/T | 40.399054 | 0.054 | 0.035 | 0.024755 | 0.020085 | 155.90 |
| rs1427261 | C/T | 40.404756 | 0.127 | 0.046 | 0.026218 | 0.092784 | 89.49 |
| rs2404840 | A/G | 40.409986 | 0.452 | 0.722 | 0.027056 | 0.492701 | 25.81 |
| rs6581723 | A/G | 40.410584 | 0.132 | 0.047 | 0.027144 | 0.097926 | 84.43 |
| rs11564144 | A/C | 40.424193 | 0.054 | 0.037 | 0.050544 | 0.01797 | 77.49 |
| rs11564249 | C/T | 40.426601 | 0.052 | 0.035 | 0.051238 | 0.017932 | 76.45 |
| rs11564247 | C/T | 40.427676 | 0.052 | 0.035 | 0.051962 | 0.017932 | 75.36 |
| rs11564168 | C/T | 40.436781 | 0.201 | 0.089 | 0.077609 | 0.140175 | 24.32 |
| rs11564234 | G/T | 40.437044 | 0.114 | 0.031 | 0.07898 | 0.093679 | 28.78 |
| rs11564233 | A/G | 40.437326 | 0.472 | 0.784 | 0.080103 | 0.590909 | 6.30 |
| rs10878583 | C/G | 40.437793 | 0.472 | 0.788 | 0.081147 | 0.598485 | 6.07 |
| rs3912855 | A/G | 40.455671 | 0.088 | 0.037 | 0.086732 | 0.055921 | 31.79 |
| rs17128239 | A/C | 40.460638 | 0.001 | 0.002 | 0.087862 | 0.001001 | 75.10 |
| rs17128301 | A/G | 40.479054 | 0.109 | 0.03 | 0.091534 | 0.088664 | 25.24 |
| rs2588400 | C/T | 40.479449 | 0.204 | 0.094 | 0.091995 | 0.138191 | 20.51 |
| rs11176811 | A/T | 40.479476 | 0.196 | 0.085 | 0.091995 | 0.13806 | 20.52 |
| rs7975790 | G/T | 40.498527 | 0.193 | 0.085 | 0.09467 | 0.133829 | 20.22 |
| rs1444216 | A/T | 40.498716 | 0.203 | 0.094 | 0.094703 | 0.136763 | 20.00 |
| rs11176884 | C/T | 40.499572 | 0.196 | 0.085 | 0.094862 | 0.13806 | 19.87 |
| rs4767978 | C/G | 40.499694 | 0.274 | 0.684 | 0.094886 | 0.564738 | 5.73 |
| rs2197356 | A/G | 40.500186 | 0.086 | 0.032 | 0.094988 | 0.059081 | 28.34 |
| rs73110066 | C/T | 40.505059 | 0.085 | 0.037 | 0.100832 | 0.052459 | 27.736 |

**Supplementary Table 2: Published age estimates of LRRK2 c.6055A (rs34637584_A)**

| **Study** | **Genotyping Markers (N)** | **Origin** | **Age Estimates (years (95% CI))** |
| --- | --- | --- | --- |
| Lesage et al. 200513 | Microsatellites (17)  SNPs (4) | Eastern European and North America | 725  (375 – 1375) |
| Zabetian et al. 200614 | Microsatellites (13)  SNPs (12) | European and Jewish Ancestry | 1875  (1375 – 2600) |
| Warren et al. 200815 | Microsatellites (2)  SNPs (39) | North African | 2600  (1950 – 3850) |
| Bar-Shira et al. 200916 | Microsatellites (15)  SNPs (1) | Ashkenazi Jew | 1525  (1300 – 1800) |
| Lesage et al. 201017 | Microsatellites (20)  SNPs (54) | North African, European, and Jewish Ancestry | 4000  (2925 – 6250) |
| Lucotte et al. 201218 | Microsatellites (7)  SNPs (1) | French, Spanish, North African, and Sephardi Jewish | 3840  (3210-5400) |
| Ben El Haj et al. 201719 | Microsatellites (10) | North African Arab Berbers | 5000  (3075 – 8700) |
| This work | SNPs (69) | North African Arab Berbers | 1200  (840 – 1560) |

**Supplementary Figure 1: Major haplotype clades *in trans* of the rs34637584_A allele (LRRK2 p.G2019S)**

**
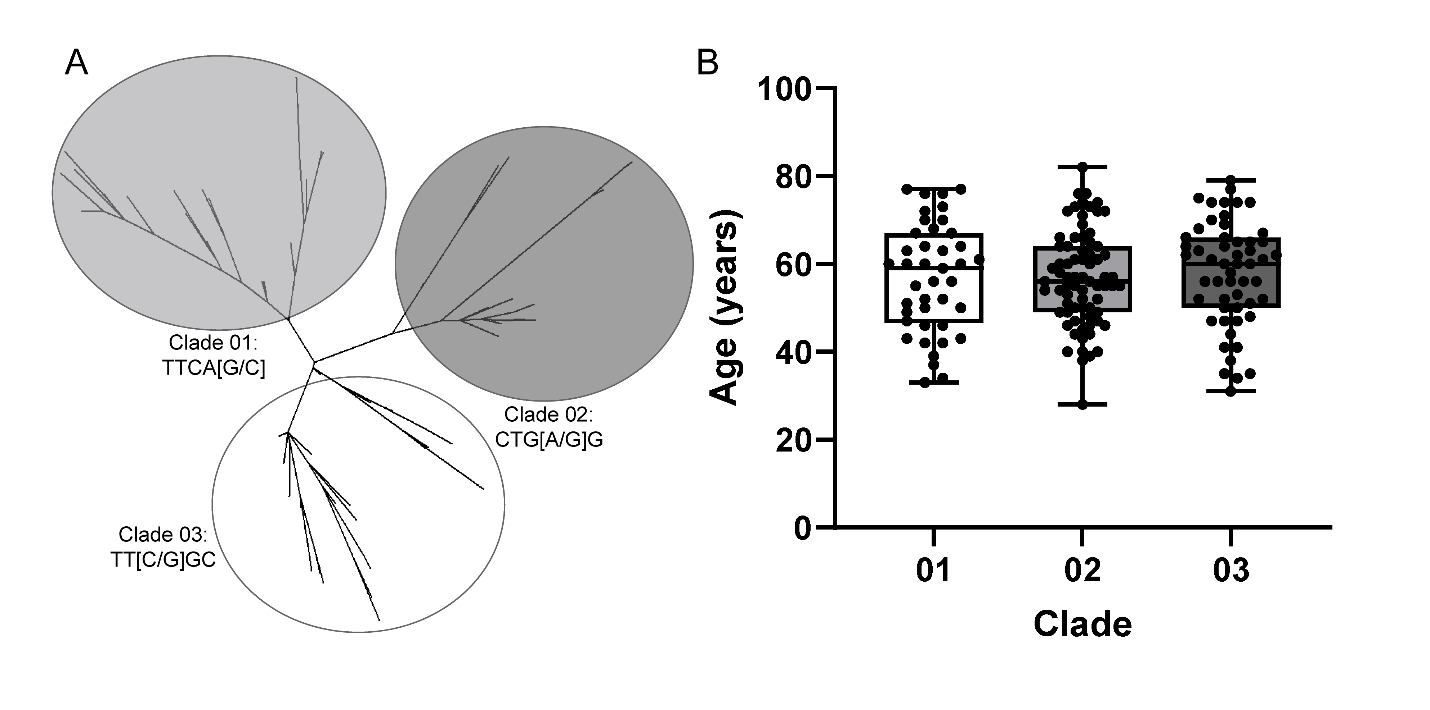
**

Three clades defined by the variability in 5 SNPs (rs2638245, rs10878199, rs2638271, rs2708438 and rs1388587) were discovered within this sample. A) Unrooted maximum likelihood phylogenic tree shows three prominent clades in our Tunisian cohort. These three clades were defined by: TTCA[G/C], n=41, freq=0.24; CTG[A/G]G, n=73, freq=0.43 and; TT[C/G]GC, n=54, freq=0.32 respectively. B) Age of initial symptom onset for affected heterozygotes in each of the three *trans* clades. No significant difference was observed (z(2) = 0.40, p=0.69).

**Supplementary Figure 2: Integrated haplotype scores in LRRK2 c.6055G (**rs34637584_A**) samples, with and without inflammatory risk markers**


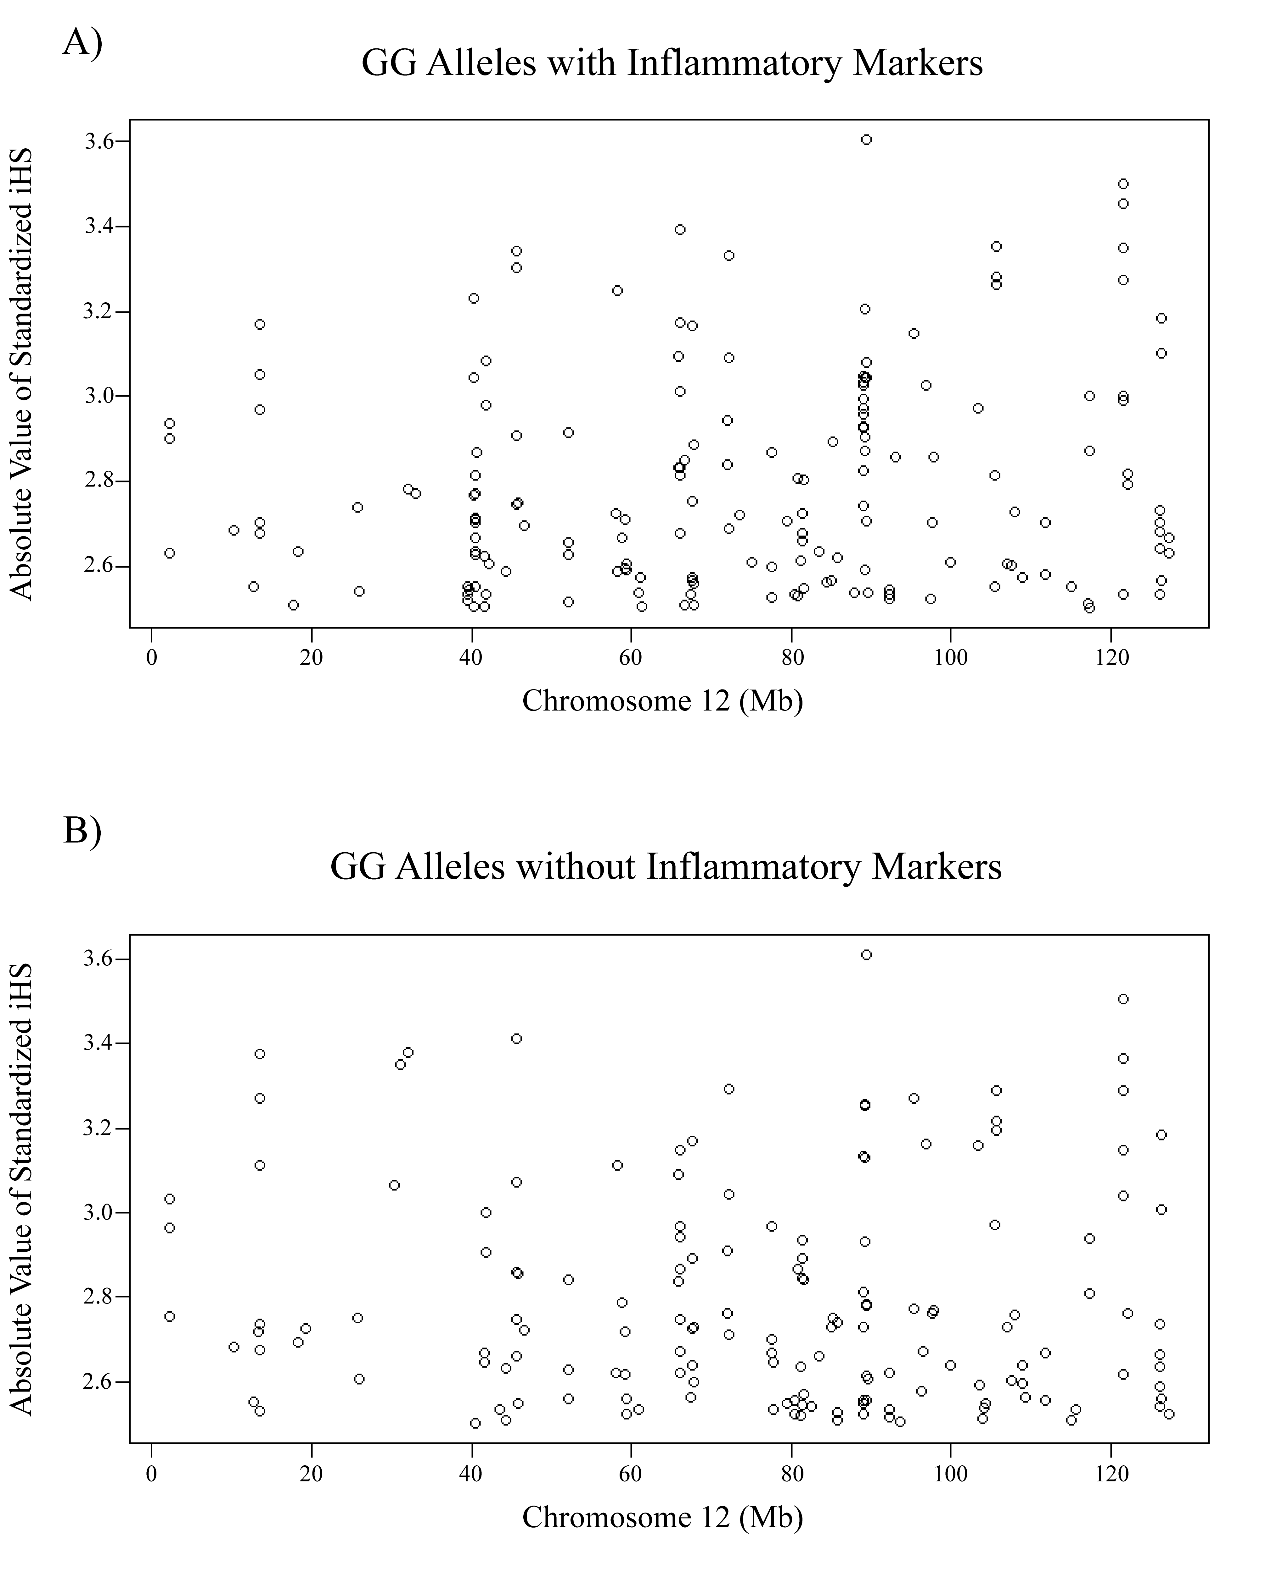


Absolute value of standardized integrated haplotype scores across chromosome 12 for: A) homozygous wildtype individuals with, and B) without alleles for known inflammatory risk markers within the *LRRK2* locus. A small cluster of elevated iHS values can be observed in the group where risk alleles remain, but the signal is lost when they are removed.

**Supplemental References**

1. Hughes, A. J., Daniel, S. E., Kilford, L. & Lees, A. J. Accuracy of clinical diagnosis of idiopathic Parkinson’s disease: a clinico-pathological study of 100 cases. *J. Neurol. Neurosurg. Psychiatry* **55**, 181–184 (1992).

2. Browning, S. R. Missing data imputation and haplotype phase inference for genome-wide association studies. *Hum. Genet.* **124**, 439–450 (2008).

3. Purcell, S. *et al.* PLINK: a tool set for whole-genome association and population-based linkage analyses. *Am. J. Hum. Genet.* **81**, 559–575 (2007).

4. Ishihara, L. *et al.* Clinical Features of Parkinson Disease Patients With Homozygous Leucine-Rich Repeat Kinase 2 G2019S Mutations. *Arch. Neurol.* **63**, 1250 (2006).

5. Schliep, K., Lopez, P., Lapointe, F.-J. & Bapteste, E. Harvesting evolutionary signals in a forest of prokaryotic gene trees. *Mol. Biol. Evol.* **28**, 1393–1405 (2011).

6. Schliep, K. P. phangorn: phylogenetic analysis in R. *Bioinformatics* **27**, 592–593 (2011).

7. Tamura, K. & Nei, M. Estimation of the number of nucleotide substitutions in the control region of mitochondrial DNA in humans and chimpanzees. *Mol. Biol. Evol.* **10**, 512–526 (1993).

8. Follett, J. *et al.* Genetic Modifiers of LRRK2 Parkinson’s Disease: A Replication Study in Arab-Berbers. *Movement disorders : official journal of the Movement Disorder Society* (2024). doi:10.1002/mds.29735

9. Browning, S. R. Multilocus association mapping using variable-length Markov chains. *Am. J. Hum. Genet.* **78**, 903–913 (2006).

10. Austerlitz, F., Kalaydjieva, L. & Heyer, E. Detecting population growth, selection and inherited fertility from haplotypic data in humans. *Genetics* **165**, 1579–1586 (2003).

11. Farrer, M. J. *et al.* Lrrk2 G2385R is an ancestral risk factor for Parkinson’s disease in Asia. *Parkinsonism Relat. Disord.* **13**, 89–92 (2007).

12. Delaneau, O., Howie, B., Cox, A. J., Zagury, J.-F. & Marchini, J. Haplotype estimation using sequencing reads. *Am. J. Hum. Genet.* **93**, 687–696 (2013).

13. Lesage, S. *et al.* LRRK2 haplotype analyses in European and North African families with Parkinson disease: a common founder for the G2019S mutation dating from the 13th century. *American journal of human genetics* **77**, 330–332 (2005).

14. Zabetian, C. P. *et al.* LRRK2 G2019S in families with Parkinson disease who originated from Europe and the Middle East: evidence of two distinct founding events beginning two millennia ago. *Am. J. Hum. Genet.* **79**, 752–758 (2006).

15. Warren, L. *et al.* A founding LRRK2 haplotype shared by Tunisian, US, European and Middle Eastern families with Parkinson’s disease. *Parkinsonism Relat. Disord.* **14**, 77–80 (2008).

16. Bar-Shira, A., Hutter, C. M., Giladi, N., Zabetian, C. P. & Orr-Urtreger, A. Ashkenazi Parkinson’s disease patients with the LRRK2 G2019S mutation share a common founder dating from the second to fifth centuries. *Neurogenetics* **10**, 355–358 (2009).

17. Lesage, S. *et al.* Parkinson’s disease-related LRRK2 G2019S mutation results from independent mutational events in humans. *Hum. Mol. Genet.* **19**, 1998–2004 (2010).

18. Lucotte, G., David, D. & Change, N. New contribution on the *LRRK2* G2019S mutation associated to Parkinson’s disease: age estimation of a common founder event of old age in Moroccan Berbers. *Int. J. Mod. Anthropol.* **1**, 11–22 (2012).

19. Ben El Haj, R. *et al.* Evidence for prehistoric origins of the G2019S mutation in the North African Berber population. *PLoS One* **12**, e0181335 (2017).
